# Supplementary material
Source: Springer Nature journal article supplement (https://www.springerprofessional.de/resource/supplementary/13638_2013_840_MOESM13_ESM.pdf/11898604)

Correlation of the sequence approximation

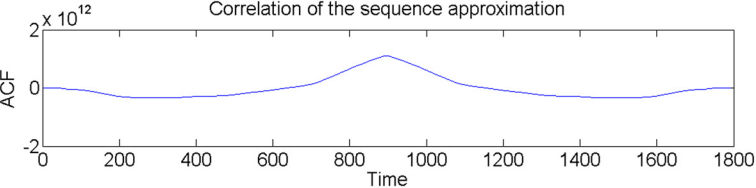

Correlation of the first difference

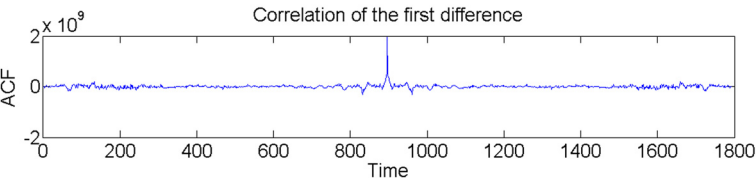

Correlation of the second difference

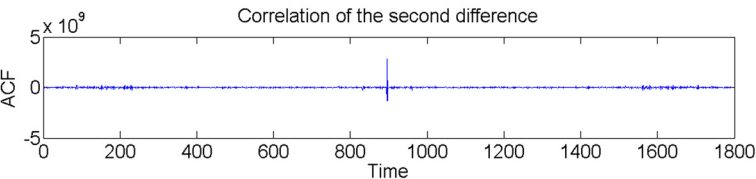

Supplement: MOESM13 [file 11898604]
